# Supplementary material for: Screening for distress in patients with intracranial tumors during the first 6 months after diagnosis using self-reporting instruments and an expert rating scale (the basic documentation for psycho-oncology short form – PO-Bado SF)
Source: PubMed Central journal article supplement (PMC6089557; doi:10.18632/oncotarget.25763), 2018-07-24
Supplement: oncotarget-09-31133-s001.pdf [file oncotarget-09-31133-s001.pdf]

## Screening for distress in patients with intracranial tumors during the first 6 months after diagnosis using self-reporting instruments and an expert rating scale (the basic documentation for psycho-oncology short form – PO-Bado SF)

### SUPPLEMENTARY MATERIALS

**Supplementary Table 1: PO-Bado results over time**

PO-Bado results over time in relation to follow-up and to t1

| a) Change in PO-Bado in relation to PO-Bado total score at t1 |          |      |
|---------------------------------------------------------------|----------|------|
|                                                               | <i>n</i> | %    |
| remained < 8                                                  | 38       | 26.6 |
| decreased < 8                                                 | 22       | 15.4 |
| increased ≥ 8                                                 | 26       | 18.2 |
| remained ≥ 8                                                  | 52       | 36.4 |
| missing                                                       | 5        | 3.5  |
| b) Dropouts                                                   |          |      |
|                                                               | <i>n</i> | %    |
| dropout after ≥ 8 postop                                      | 26       | 18.2 |
| dropout after <8 postop                                       | 15       | 10.5 |
| complete FU after ≥ 8 postop                                  | 42       | 29.4 |
| complete FU after <8 postop                                   | 46       | 32.2 |
| other                                                         |          |      |
| missing                                                       | 10       | 7    |
| c) Change in Po-Bado in relation to dropout                   |          |      |
|                                                               | <i>n</i> | %    |
| dropout after ≥ 8 postop                                      |          |      |
| remained ≥ 8                                                  | 23       | 88.5 |
| decreased <8                                                  | 3        | 11.5 |
| dropout after <8 postop                                       | <i>n</i> | %    |
| remained <8                                                   | 9        | 60   |
| increased ≥ 8                                                 | 6        | 40   |
| complete FU ≥ 8 postop                                        | <i>n</i> | %    |
| remained ≥ 8                                                  | 26       | 61.9 |
| decreased <8                                                  | 16       | 38.1 |
| complete FU <8 postop                                         | <i>n</i> | %    |
| remained <8                                                   | 25       | 54.3 |
| increased ≥ 8                                                 | 20       | 43.5 |
| decreased <8                                                  | 1        | 2.2  |

**Supplementary Table 2: Results of subpopulations according to tumor entity**

|                                              | <b>Metastasis</b> | <b>Glioma<br/>(WHO I-IV)</b> | <b>Meningioma</b> | <b>Other</b> | <b>p-value</b> |
|----------------------------------------------|-------------------|------------------------------|-------------------|--------------|----------------|
| PO-Bado GB postop<br>(mean ± SD)             | 4.5 ± 1.5         | 4.8 ± 2.1                    | 3.8 ± 2.0         | 3.5 ± 1.5    | 0.026          |
| PO-Bado GB 3 months<br>(mean ± SD)           | 3.8 ± 2.0         | 4.4 ± 2.3                    | 4.0 ± 2.6         | 3.1 ± 2.5    | 0.380          |
| PO-Bado GB 6 months<br>(mean ± SD)           | 4.3 ± 2.2         | 4.3 ± 2.4                    | 3.2 ± 2.5         | 3.0 ± 3.1    | 0.176          |
| PO-Bado total score postop<br>(mean ± SD)    | 7.9 ± 2.2         | 8.6 ± 4.2                    | 6.6 ± 3.9         | 6.4 ± 3.7    | 0.073          |
| PO-Bado total score 3<br>months (mean ± SD)* | 9.5 ± 5.3         | 9.3 ± 5.5                    | 7.9 ± 5.3         | 4.4 ± 3.8    | 0.025          |
| PO-Bado total score 6<br>months (mean ± SD)  | 8.6 ± 5.3         | 8.8 ± 5.5                    | 6.5 ± 5.7         | 5.5 ± 4.8    | 0.172          |
| DT postop (mean ± SD)                        | 4.5 ± 1.9         | 5.7 ± 2.6                    | 4.4 ± 2.5         | 4.2 ± 2.1    | 0.033          |
| DT 3 months (mean ± SD)                      | 3.7 ± 2.0         | 4.5 ± 2.7                    | 3.9 ± 2.8         | 3.8 ± 2.6    | 0.559          |
| DT6 months (mean ± SD)                       | 3.6 ± 2.1         | 4.0 ± 2.2                    | 3.4 ± 3.0         | 2.6 ± 2.4    | 0.569          |

\*post hoc analysis: metastasis vs. other  $p = 0.047$ ; astrocytic tumor vs. other  $p = 0.02$ .  
All pairwise comparisons  $p > 0.05$ .

**Supplementary Table 3: Detailed results of ROC analyses.** See Supplementary\_Table\_3

**Supplementary Table 4: Detailed EORTC results t1-t3**

|                        | median (range) | median (range) | median (range) | median (range) |
|------------------------|----------------|----------------|----------------|----------------|
|                        | Overall        | postop         | @ 3 months     | @ 6 months     |
| GHS                    | 58.3 (0–100)   | 50 (0–100)     | 58.3 (0–100)   | 75 (0–100)     |
| Physical Functioning   | 80 (0–100)     | 80 (26.7–100)  | 80 (0–100)     | 86.7 (0–100)   |
| Role Functioning       | 66.7 (0–100)   | 66.7 (0–100)   | 66.7 (0–100)   | 83.3 (0–100)   |
| Emotional Functioning  | 66.7 (0–100)   | 58.3 (0–100)   | 75.0 (0–100)   | 83.3 (0–100)   |
| Cognitive Functioning  | 83.3 (0–100)   | 66.7 (0–100)   | 83.3 (0–100)   | 83.3 (0–100)   |
| Social Functioning     | 66.7 (0–100)   | 66.7 (0–100)   | 66.7 (0–100)   | 83.3 (0–100)   |
| Fatigue                | 33.3 (0–100)   | 33.3 (0–100)   | 33.3 (0–100)   | 33.3 (0–100)   |
| Nausea & Vomiting      | 0.0 (0–83.3)   | 0.0 (0–83.3)   | 0.0 (0–66.7)   | 0.0 (0–66.7)   |
| Pain                   | 0.0 (0–100)    | 16.7 (0–100)   | 0.0 (0–100)    | 0.0 (0–83.3)   |
| Insomnia               | 33.3 (0–100)   | 33.3 (0–100)   | 33.3 (0–100)   | 33.3 (0–100)   |
| Appetite Loss          | 0.0 (0–100)    | 0.0 (0–100)    | 0.0 (0–100)    | 0.0 (0–100)    |
| Constipation           | 0.0 (0–100)    | 0.0 (0–100)    | 0.0 (0–100)    | 0.0 (0–100)    |
| Diarrhoea              | 0.0 (0–66.7)   | 0.0 (0–66.7)   | 0.0 (0–66.7)   | 0.0 (0–66.7)   |
| Financial Difficulties | 0.0 (0–100)    | 0.0 (0–100)    | 0.0 (0–100)    | 0.0 (0–100)    |
| Future Uncertainty     | 29.2 (0–100)   | 41.7 (0–100)   | 25.0 (0–100)   | 16.7 (0–100)   |
| Visual Disorder        | 0.0 (0–100)    | 11.1 (0–100)   | 0.0 (0–100)    | 0.0 (0–100)    |
| Motor Dysfunction      | 11.1 (0–100)   | 11.1 (0–100)   | 11.1 (0–88.9)  | 0.0 (0–100)    |
| Communication Deficit  | 0.0 (0–100)    | 11.1 (0–100)   | 0.0 (0–88.9)   | 0.0 (0–100)    |
| Headache               | 33.3 (0–100)   | 33.3 (0–100)   | 0.0 (0–100)    | 0.0 (0–100)    |
| Seizure                | 0.0 (0–100)    | 0.0 (0–100)    | 0.0 (0–100)    | 0.0 (0–100)    |
| Drowsiness             | 33.3 (0–100)   | 33.3 (0–100)   | 33.3 (0–100)   | 33.3 (0–100)   |
| Itchy Skin             | 0.0 (0–100)    | 0.0 (0–100)    | 0.0 (0–100)    | 0.0 (0–100)    |
| Hair Loss              | 0.0 (0–100)    | 0.0 (0–100)    | 0.0 (0–100)    | 0.0 (0–100)    |
| Weakness of Legs       | 0.0 (0–100)    | 0.0 (0–100)    | 0.0 (0–100)    | 0.0 (0–100)    |
| Bladder Control        | 0.0 (0–100)    | 0.0 (0–100)    | 0.0 (0–100)    | 0.0 (0–100)    |

**Supplementary Table 5: Correlation between PO-Bado and EORTC instrument. See Supplementary\_Table\_5**
